# Supplementary material
Source: PubMed Central journal article supplement (PMC4552619)
Supplement: NIHMS702788-supplement-Figure_S1.pdf [file NIHMS702788-supplement-Figure_S1.pdf]

## SUPPLEMENTARY FIGURE LEGENDS

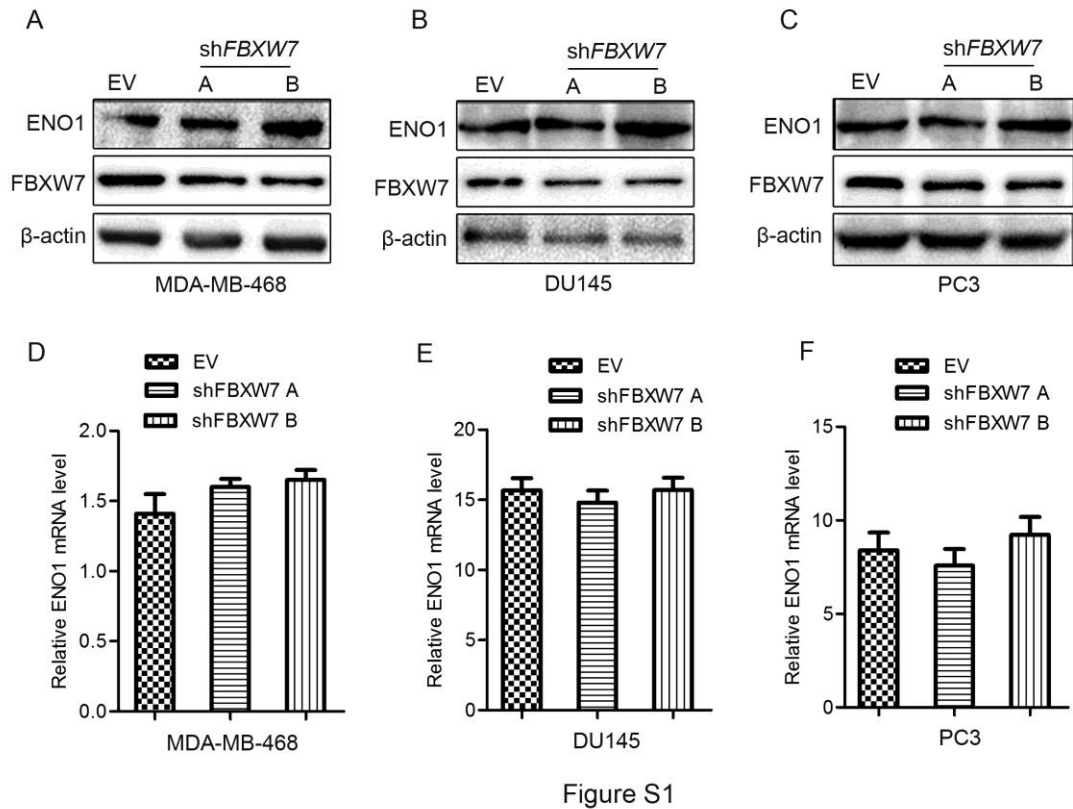

**Supplementary Figure 1.** Knockdown FBXW7 up-regulates the protein level of ENO1. (A-C) Western blotting assay on the whole cell lysates of FBXW7 knockdown cell lines (MDA-MB-468, DU145 and PC3) using anti-ENO1 and anti-FBXW7 antibody. (D-F) qRT-PCR analysis to detect the mRNA level of ENO1 in FBXW7 knockdown cell lines (MDA-MB-468, DU145 and PC3). All results are representative of three independent experiments. EV: empty vector.
